# Supplementary material
Source: PubMed Central journal article supplement (PMC5958604)
Supplement: NIHMS964745-supplement-supp.pdf [file NIHMS964745-supplement-supp.pdf]

**Supplemental Table 1:** Least squares means and standard deviations are reported for each measured trait of Generation 6. Abbreviations are CW (Corolla Width), TW (Throat Width), TL (Tube Length), A/S (Anther-stigma Separation), and PV (Pollen Viability).

| Generation 6    |          | Population |       |       |       |        |
|-----------------|----------|------------|-------|-------|-------|--------|
|                 |          | No Bee     |       | Bee   |       | Source |
| Trait           |          | A1         | A2    | B1    | B2    | F3M    |
| Avg. CW (mm)    | mean     | 17.59      | 18.00 | 18.49 | 17.14 | 18.63  |
|                 | st. dev. | 3.79       | 2.97  | 3.01  | 2.46  | 2.61   |
| Avg. TW (mm)    | mean     | 8.82       | 8.39  | 9.31  | 8.83  | 9.15   |
|                 | st. dev. | 1.46       | 1.27  | 1.45  | 1.16  | 1.28   |
| Avg. TL (mm)    | mean     | 11.45      | 10.86 | 11.92 | 11.27 | 11.58  |
|                 | st. dev. | 1.78       | 1.31  | 1.42  | 1.23  | 1.39   |
| Avg. A/S (mm)   | mean     | 1.66       | 1.96  | 1.50  | 1.91  | 2.32   |
|                 | st. dev. | 1.30       | 1.05  | 0.96  | 1.07  | 1.19   |
| Leaf Width (mm) | mean     | 17.34      | 17.43 | 17.92 | 17.56 | 18.67  |
|                 | st. dev. | 4.59       | 4.51  | 4.64  | 4.79  | 4.35   |
| In Total Pollen | mean     | 4.82       | 4.66  | 5.16  | 5.08  | 4.98   |
|                 | st. dev. | 0.71       | 0.68  | 0.66  | 0.69  | 0.77   |
| PV              | mean     | 0.52       | 0.50  | 0.56  | 0.39  | 0.51   |
|                 | st. dev. | 0.23       | 0.24  | 0.22  | 0.21  | 0.25   |

**Supplemental Table 2:** Least squares means and standard deviations for each measured trait of Generation 7. Abbreviations are as in Supplemental Table 1, although additional traits are reported here.

| Generation 7    |          | Population |       |       |       |        |
|-----------------|----------|------------|-------|-------|-------|--------|
|                 |          | No Bee     |       | Bee   |       | Source |
| Trait           |          | A1         | A2    | B1    | B2    |        |
| Days to Flower  | mean     | 29.04      | 28.61 | 27.60 | 27.30 | 30.34  |
|                 | st. dev. | 4.28       | 4.09  | 3.30  | 3.65  | 4.47   |
| Avg. CW (mm)    | mean     | 18.39      | 17.96 | 18.54 | 17.94 | 17.40  |
|                 | st. dev. | 2.94       | 2.96  | 2.78  | 2.80  | 3.29   |
| Avg. TW (mm)    | mean     | 9.37       | 9.03  | 9.18  | 8.90  | 8.69   |
|                 | st. dev. | 1.02       | 1.14  | 1.11  | 1.14  | 1.17   |
| Avg. TL (mm)    | mean     | 11.54      | 11.09 | 11.54 | 11.34 | 10.87  |
|                 | st. dev. | 1.44       | 1.36  | 1.30  | 1.32  | 1.56   |
| Avg. A/S (mm)   | mean     | 0.86       | 1.45  | 1.67  | 1.92  | 1.86   |
|                 | st. dev. | 0.76       | 1.18  | 1.11  | 0.99  | 1.22   |
| Leaf Width (mm) | mean     | 17.06      | 16.45 | 15.86 | 15.73 | 14.86  |
|                 | st. dev. | 3.30       | 3.68  | 3.57  | 3.81  | 3.87   |
| Self Seed (raw) | mean     | 37.98      | 27.43 | 16.35 | 9.74  | 5.81   |
|                 | st. dev. | 51.30      | 42.54 | 36.00 | 20.59 | 14.34  |
| In Total Pollen | mean     | 9.10       | 9.12  | 9.28  | 9.07  | 8.94   |
|                 | st. dev. | 0.45       | 0.44  | 0.45  | 0.52  | 0.58   |
| PV              | mean     | 0.68       | 0.65  | 0.65  | 0.60  | 0.55   |
|                 | st. dev. | 0.18       | 0.19  | 0.18  | 0.20  | 0.24   |

**Supplemental Table 3:** Neutral marker data for genotyped individuals of Generation 6. Unique alleles, defined by length in bp, are listed for each of four markers along with their respective frequency in each population. N is the total number of individuals genotyped from each population.  $H_E$  is the expected heterozygosity for each locus.  $H_O$  is the observed heterozygosity.

| MARKER DATA |                    | POPULATION |            |            |            |               |
|-------------|--------------------|------------|------------|------------|------------|---------------|
|             |                    |            |            |            |            | <b>Source</b> |
|             | <b>Marker e461</b> | <b>A1</b>  | <b>A2</b>  | <b>B1</b>  | <b>B2</b>  | <b>e</b>      |
| ALLELE      | 181                | 0.00       | 0.05       | 0.11       | 0.08       | 0.11          |
|             | 188                | 0.49       | 0.06       | 0.39       | 0.55       | 0.44          |
|             | 192                | 0.50       | 0.90       | 0.50       | 0.37       | 0.45          |
|             | <b>N</b>           | <b>112</b> | <b>180</b> | <b>161</b> | <b>145</b> | <b>183</b>    |
|             | $H_E$              | 0.50       | 0.19       | 0.59       | 0.56       | 0.59          |
|             | $H_O$              | 0.07       | 0.08       | 0.28       | 0.32       | 0.61          |
|             |                    |            |            |            |            | <b>Source</b> |
|             | <b>Marker e523</b> | <b>A1</b>  | <b>A2</b>  | <b>B1</b>  | <b>B2</b>  | <b>e</b>      |
| ALLELE      | 211                | 0.21       | 0.09       | 0.25       | 0.25       | 0.32          |
|             | 213                | 0.78       | 0.90       | 0.72       | 0.73       | 0.67          |
|             | 217                | 0.01       | 0.01       | 0.03       | 0.01       | 0.01          |
|             | <b>N</b>           | <b>117</b> | <b>182</b> | <b>128</b> | <b>118</b> | <b>145</b>    |
|             | $H_E$              | 0.35       | 0.18       | 0.42       | 0.40       | 0.45          |
|             | $H_O$              | 0.06       | 0.09       | 0.28       | 0.34       | 0.37          |
|             |                    |            |            |            |            | <b>Source</b> |
|             | <b>Marker e755</b> | <b>A1</b>  | <b>A2</b>  | <b>B1</b>  | <b>B2</b>  | <b>e</b>      |
| ALLELE      | 481                | 1.00       | 0.96       | 0.87       | 0.90       | 0.83          |
|             | 485                | 0.00       | 0.04       | 0.13       | 0.10       | 0.17          |
|             | <b>N</b>           | <b>78</b>  | <b>88</b>  | <b>89</b>  | <b>89</b>  | <b>146</b>    |
|             | $H_E$              | 0.00       | 0.08       | 0.23       | 0.17       | 0.28          |

|                    |                | H <sub>o</sub> | 0.00       | 0.04       | 0.16       | 0.12       | 0.24 |
|--------------------|----------------|----------------|------------|------------|------------|------------|------|
|                    |                | <b>Source</b>  |            |            |            |            |      |
| <b>Marker e641</b> |                | <b>A1</b>      | <b>A2</b>  | <b>B1</b>  | <b>B2</b>  | <b>e</b>   |      |
| <b>ALLELE</b>      | <i>181</i>     | 0.38           | 0.50       | 0.40       | 0.34       | 0.27       |      |
|                    | <i>188</i>     | 0.44           | 0.24       | 0.39       | 0.45       | 0.47       |      |
|                    | <i>192</i>     | 0.18           | 0.25       | 0.21       | 0.21       | 0.26       |      |
|                    | <b>N</b>       | <b>94</b>      | <b>134</b> | <b>163</b> | <b>129</b> | <b>185</b> |      |
|                    | H <sub>E</sub> | 0.63           | 0.62       | 0.65       | 0.64       | 0.64       |      |
|                    | H <sub>o</sub> | 0.26           | 0.21       | 0.50       | 0.52       | 0.71       |      |

**Supplemental Table 4. The effect of chromosomal polymorphisms on traits in Source**

**plants of Generation 6. (A)** F-test summary with chromosomal polymorphism states scored 0

(ancestral homozygote), 1 (heterozygotes), and 2 (derived homozygote). \* denotes significance

when  $\alpha = 0.05$ , \*\* significance when  $\alpha = 0.001$ . **(B)** Effect summary of chromosomal

polymorphism on source trait means for all significant F-tests in panel A.

| <b>(A) One-way ANOVAs with genotype as factor</b> |                      |        |         |         |                  |        |         |         |
|---------------------------------------------------|----------------------|--------|---------|---------|------------------|--------|---------|---------|
| Polymorphism:                                     | <b>Inversion [C]</b> |        |         |         | <b>Drive [D]</b> |        |         |         |
|                                                   | df num               | df dem | F ratio | P value | df num           | df dem | F ratio | P value |
| Avg. CW                                           | 2                    | 172    | 2.31    | 0.103   | 2                | 176    | 0.46    | 0.635   |
| Avg. TW                                           | 2                    | 172    | 2.64    | 0.074   | 2                | 176    | 0.26    | 0.775   |
| Avg. TL                                           | 2                    | 172    | 1.35    | 0.263   | 2                | 176    | 0.31    | 0.734   |
| Avg. A/S                                          | 2                    | 172    | 6.06*   | 0.003   | 2                | 176    | 1.53    | 0.218   |
| Leaf Width                                        | 2                    | 172    | 4.17*   | 0.017   | 2                | 176    | 1.45    | 0.237   |
| In Total Pollen                                   | 2                    | 170    | 2.61    | 0.077   | 2                | 174    | 4.65*   | 0.011   |
| PV                                                | 2                    | 170    | 6.45*   | 0.002   | 2                | 174    | 18.88** | <.0001  |

| <b>(B) Polymorphism effect in Source</b> |                       |                             |       |
|------------------------------------------|-----------------------|-----------------------------|-------|
| <b>Inversion [C]</b>                     | <b>Ancestral mean</b> | <b>Derived allele count</b> |       |
|                                          |                       | 1                           | 2     |
| Avg. A/S (mm)                            | 1.97                  | 0.63                        | 0.64  |
| Leaf Width (mm)                          | 18.81                 | 0.49                        | -2.35 |
| PV                                       | 0.59                  | -0.13                       | -0.17 |
| <b>Drive [D]</b>                         |                       |                             |       |
| In Total Pollen                          | 8.24                  | -0.26                       | -0.53 |
| PV                                       | 0.65                  | -0.11                       | -0.32 |
